# Supplementary material for: Engineering Cu2−xS-conjugated upconverting nanocomposites for NIR-II light-induced enhanced chemodynamic/photothermal therapy of cancer
Source: Royal Society of Chemistry journal article supplement (doi:10.1039/d1tb00337b), 2021-01-01
Supplement: d1tb00337b1.pdf [file d1tb00337b1.pdf]

## Supporting Information

### **Engineering Cu<sub>2-x</sub>S-conjugated upconverting nanocomposites for NIR-II light-induced enhanced chemodynamic/photothermal therapy of cancer**

Kaimin Du,<sup>[a,b]</sup> Shuang Zhao,<sup>[a]</sup> Jing Feng,<sup>\*,[a,b]</sup> Xuan Gao,<sup>[a,b]</sup> Kai Liu<sup>[a,c]</sup>, Xiaozhen Wang<sup>\*,[d]</sup>,  
Manli Zhang<sup>[a,b]</sup>, Yao Li<sup>[a,b]</sup>, Yu Lu<sup>[a]</sup>, and Hongjie Zhang<sup>\*,[a,b,c]</sup>

<sup>a</sup>State Key Laboratory of Rare Earth Resource Utilization, Changchun Institute of Applied Chemistry, Chinese Academy of Sciences, 5625 Renmin Street, Changchun 130022, China

<sup>b</sup>University of Science and Technology of China, Hefei 230026, China

<sup>c</sup>Department of Chemistry, Tsinghua University, Beijing 100084, China

<sup>d</sup>The First Hospital of Jilin University, Changchun 130021, China

\*Corresponding authors.

E-mail addresses: fengj@ciac.ac.cn (J. Feng), xzwang@jlu.edu.cn (X. Z. Wang),  
hongjie@ciac.ac.cn (H. J. Zhang)

## Supporting Figures

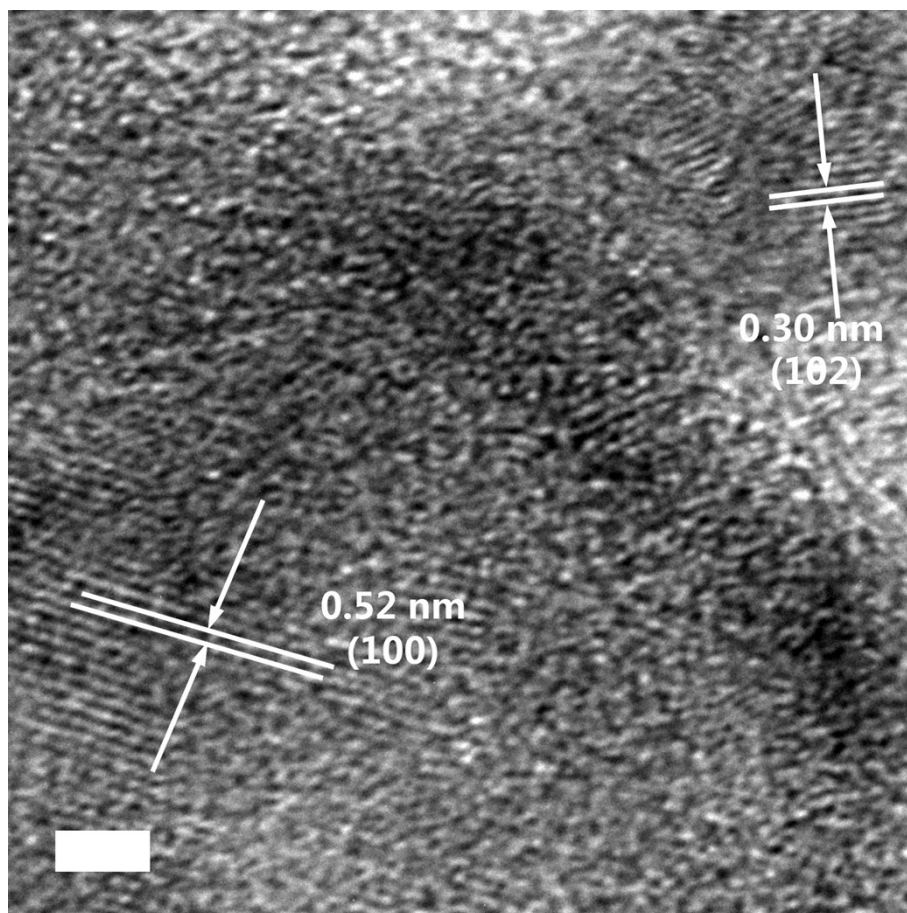

**Figure S1.** HRTEM image of UCNPs-Cu<sub>2-x</sub>S.

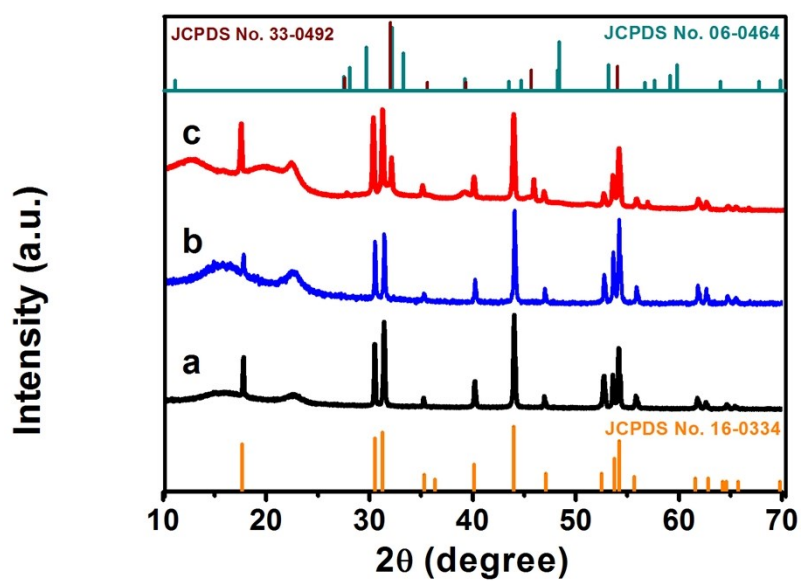

**Figure S2.** XRD patterns of NaYF<sub>4</sub>:Yb/Er (black line), NaYF<sub>4</sub>:Yb/Er@NaYF<sub>4</sub>:Yb (blue line), and UCNPs-Cu<sub>2-x</sub>S (red line). The vertical bars show the peak positions and intensities for pure NaYF<sub>4</sub> (JCPDS No. 16-0334), Cu<sub>2</sub>S (JCPDS No. 33-0492) and CuS (JCPDS card no. 06-0464) as the references.

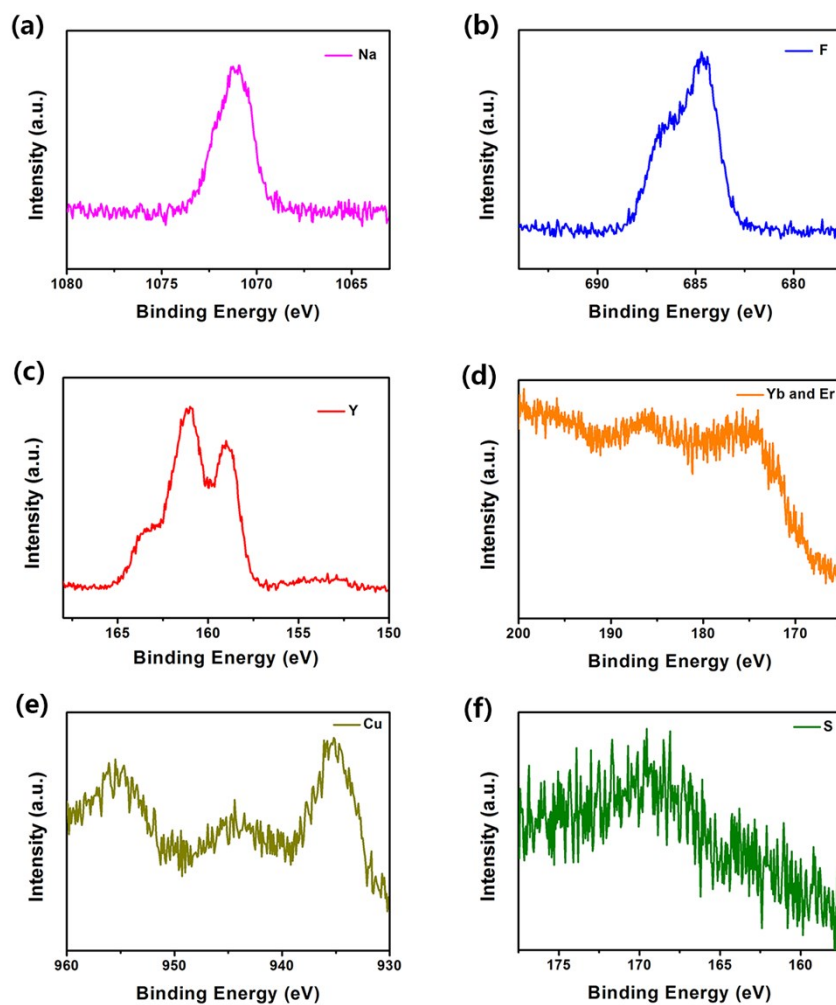

**Figure S3.** X-ray photoelectron spectroscopy of UCNPs-Cu<sub>2-x</sub>S.

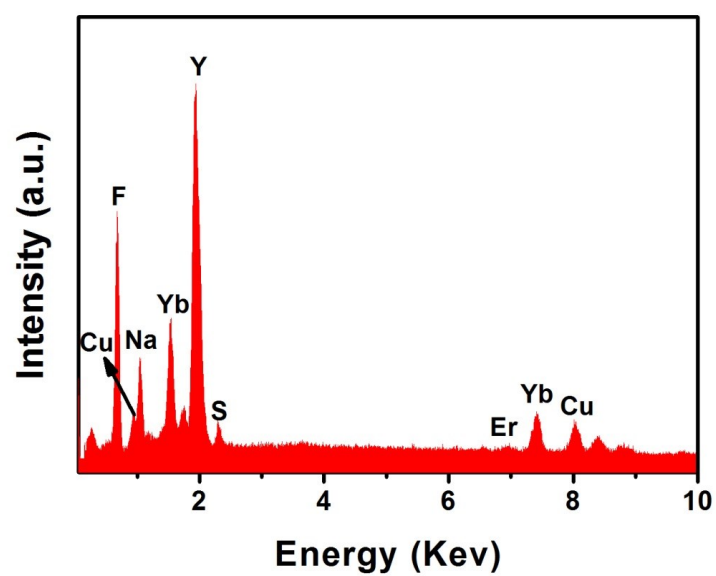

**Figure S4.** Energy-dispersive X-ray (EDX) spectrum of UCNPs-Cu<sub>2-x</sub>S.

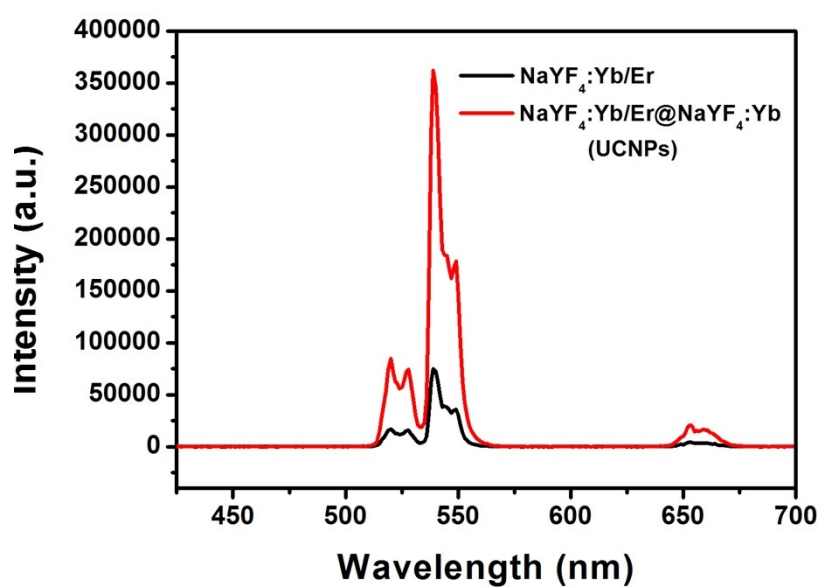

**Figure S5.** UCL spectra of NaYF<sub>4</sub>:Yb/Er core and NaYF<sub>4</sub>:Yb/Er@NaYF<sub>4</sub>:Yb core-shell nanoparticles in cyclohexane excited by 980-nm NIR laser.

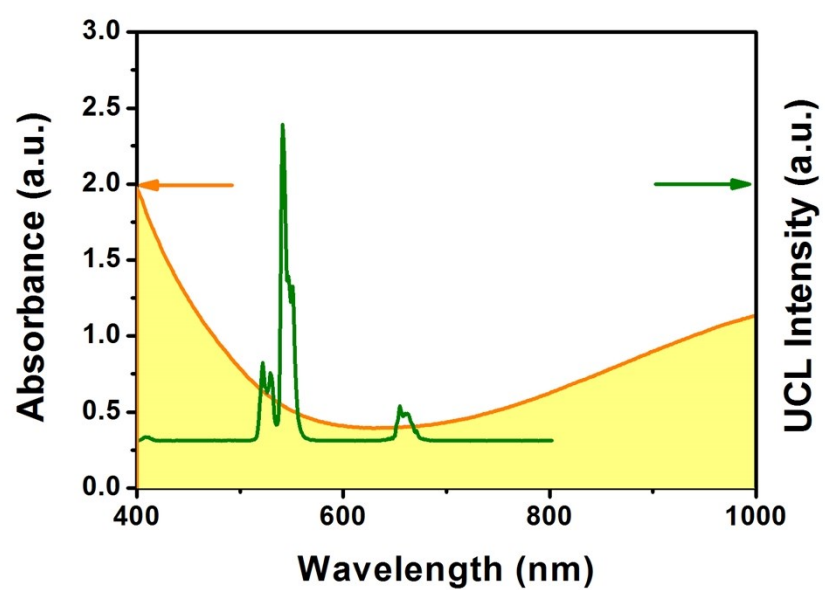

**Figure S6.** Spectral overlap between the UCL spectrum of CS-UCNPs (red line) and absorption spectrum of UCNPs-Cu<sub>2-x</sub>S (orange line).

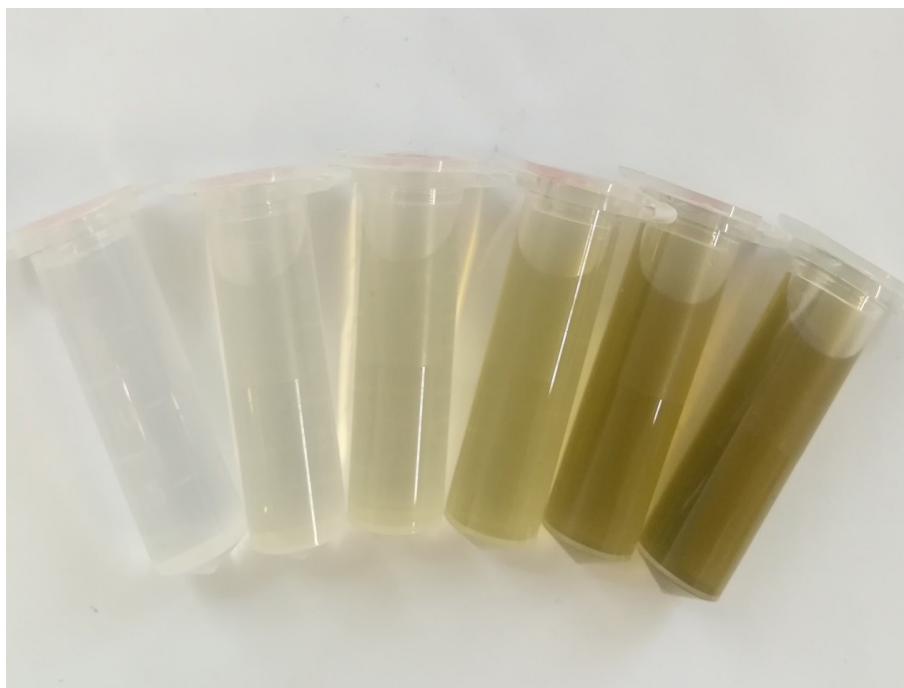

**Figure S7.** The digital photograph of UCNPs-Cu<sub>2-x</sub>S solution with different Cu concentrations (0, 12.5, 25, 50, 100 and 200  $\mu\text{g/mL}$ ).



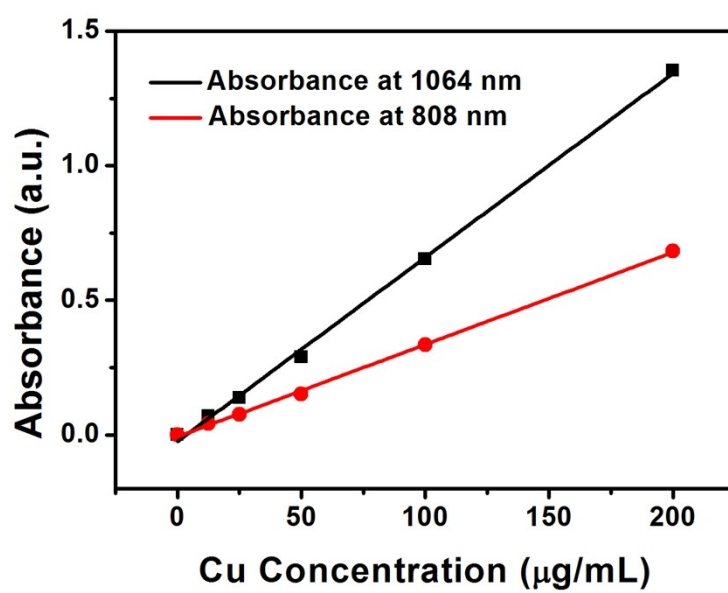

**Figure S8.** A linear relationship for the optical absorbance at 808 nm and 1064 nm as a function of the concentration of UCNPs-Cu<sub>2-x</sub>S nanocomposites.

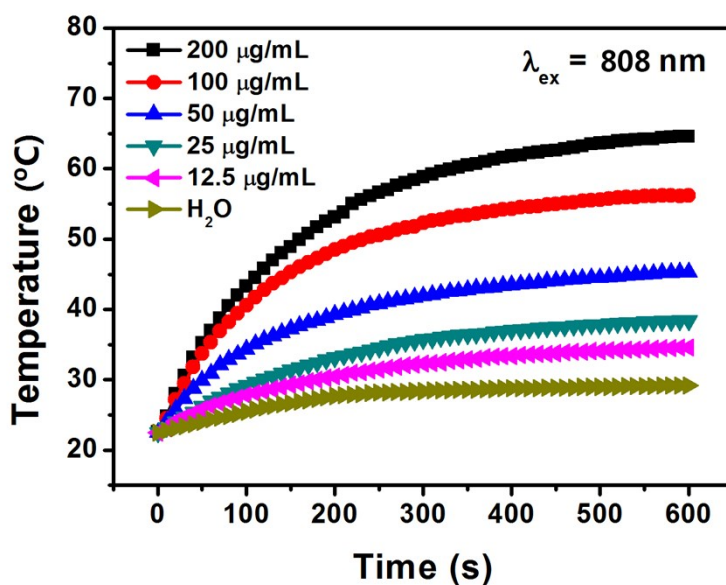

**Figure S9.** Temperature elevation of water and UCNPs-Cu<sub>2-x</sub>S aqueous solutions with different concentrations as a function of irradiation time exposure to 808-nm NIR laser (1.0 W/cm<sup>2</sup>). The temperature was measured every 10 s using a thermocouple microprobe.

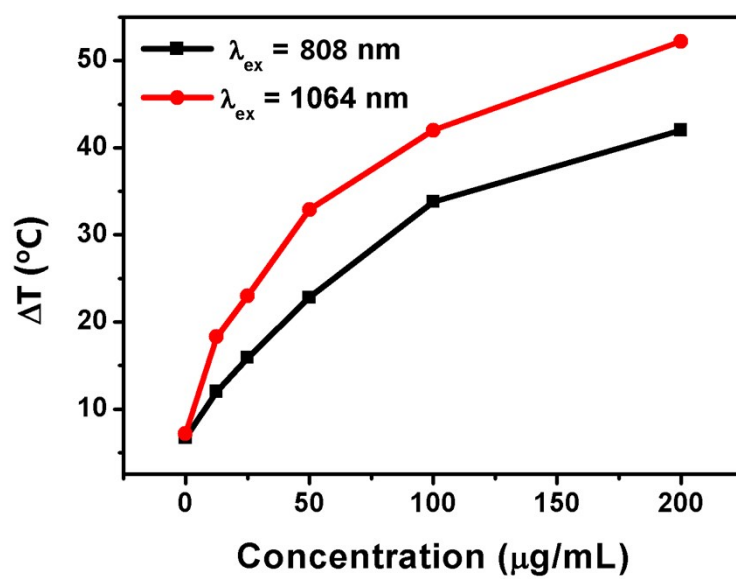

**Figure S10.** Plot of temperature change ( $\Delta T$ ) over a period of 600 s versus the concentration of UCNPs-Cu<sub>2-x</sub>S nanocomposites.

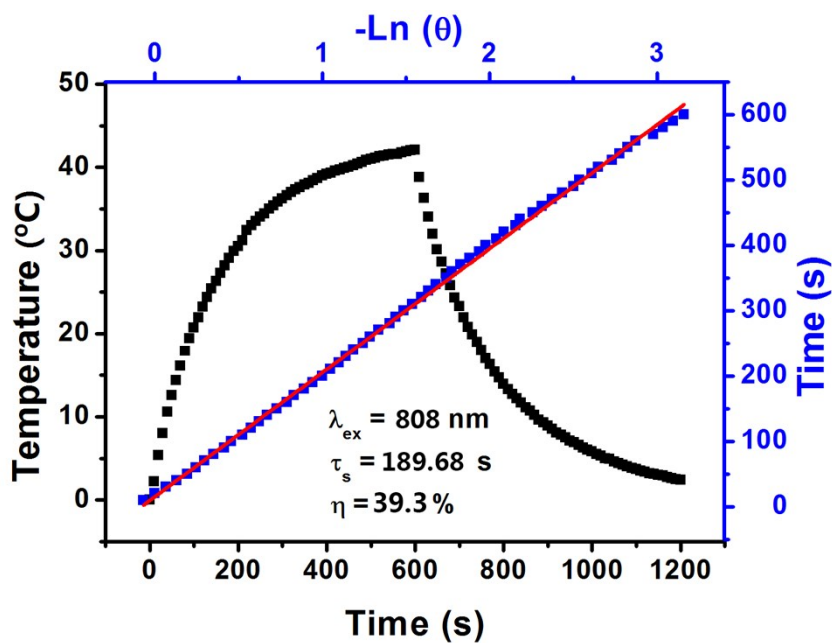

**Figure S11.** Calculation of the photothermal-conversion efficiency at 808 nm (NIR-I). Black line: The photothermal response of UCNPs-Cu<sub>2-x</sub>S aqueous solution (200 µg/mL) for 600 s with NIR-I laser and then the laser was shut off. Red line: linear time data versus -lnθ obtained from the cooling period.

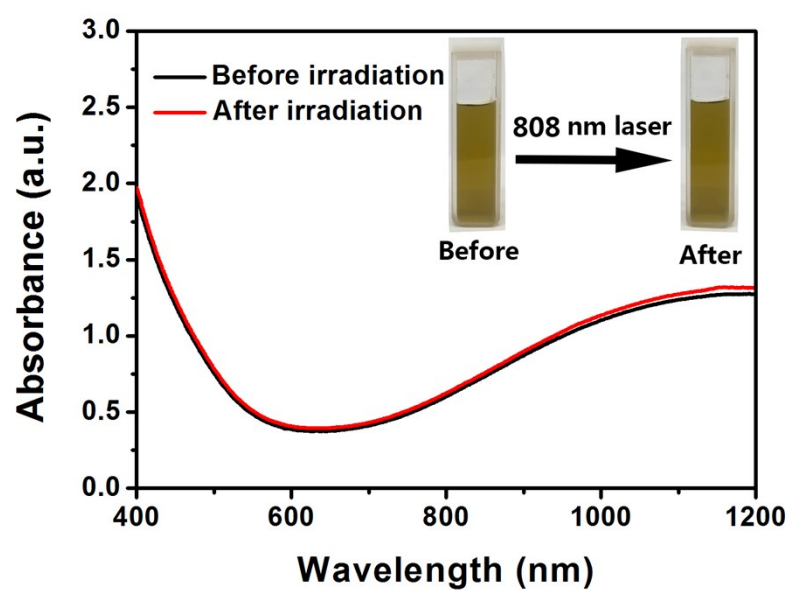

**Figure S12.** UV-vis-NIR absorption spectra of UCNPs-Cu<sub>2-x</sub>S dispersion before and after 1 h laser irradiation (808 nm, 1.0 W/cm<sup>2</sup>); inset pictures represented the well-dispersed UCNPs-Cu<sub>2-x</sub>S solution before and after irradiation.

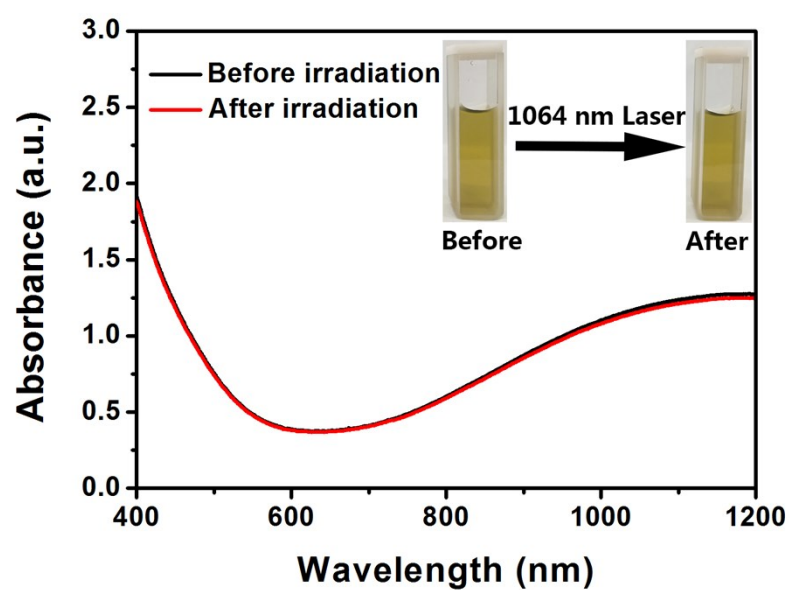

**Figure S13.** UV-vis-NIR absorption spectra of UCNPs-Cu<sub>2-x</sub>S dispersion before and after 1 h laser irradiation (1064 nm, 1.0 W/cm<sup>2</sup>); inset pictures represented the well-dispersed UCNPs-Cu<sub>2-x</sub>S solution before and after irradiation.

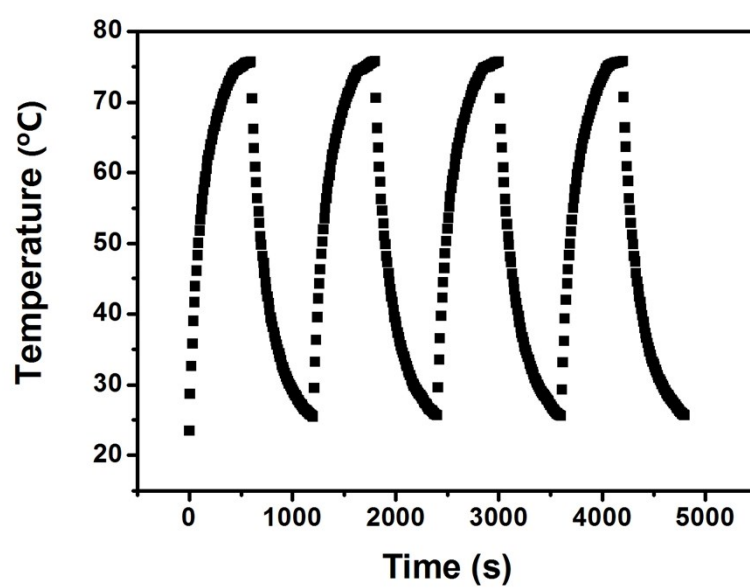

**Figure S14.** Temperature variation of UCNPs-Cu<sub>2-x</sub>S aqueous solution (200 µg/mL) under “on-off” cycles of 1064 nm laser irradiation.

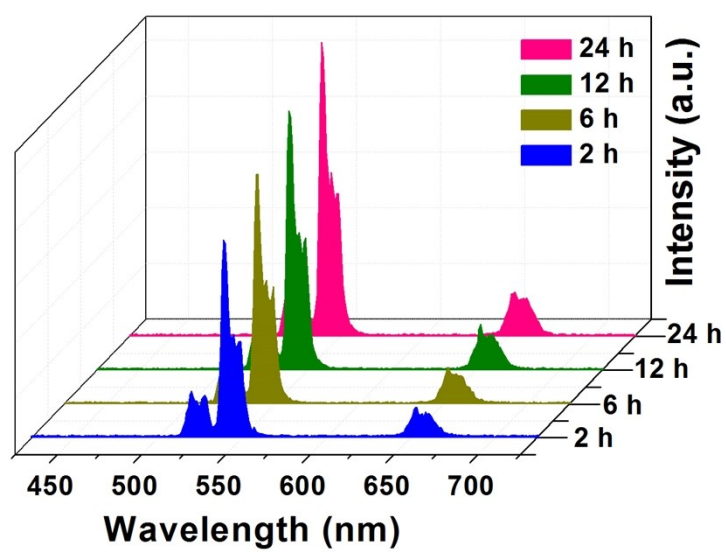

**Figure S15.** Time-dependent UCL spectra of HeLa cells incubated with UCNPs-Cu<sub>2-x</sub>S nanocomposites.



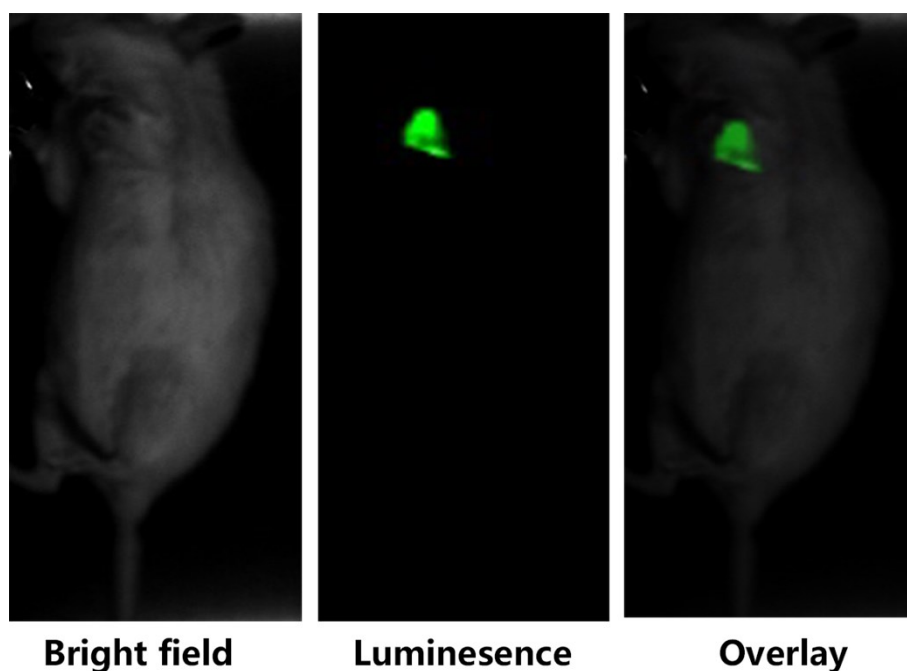

**Figure S16.** *In vivo* UCL images of the mouse after intratumoral injection of UCNPs-Cu<sub>2-x</sub>S nanocomposites.

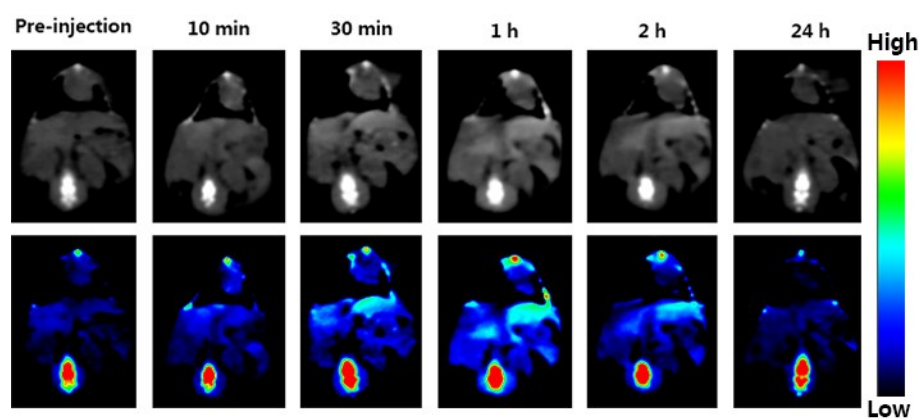

**Figure S17.** *In vivo* CT coronal view images of a mouse after intravenous injection of UCNPs-Cu<sub>2-x</sub>S nanocomposites at timed intervals.

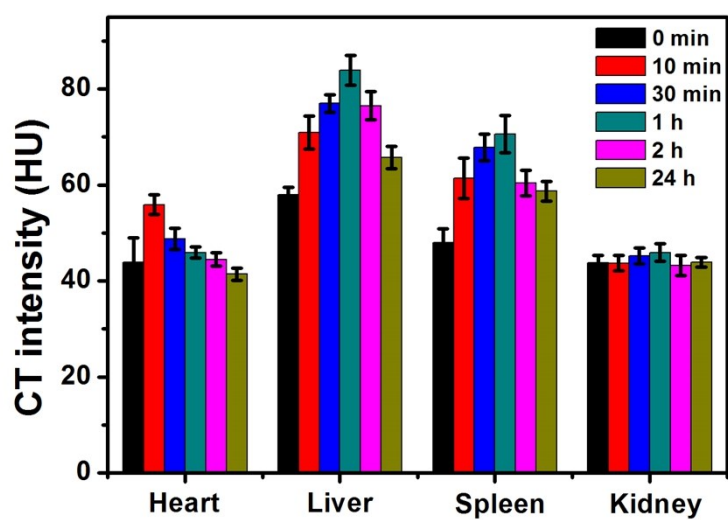

**Figure S18.** The HU values of different organs of a mouse after intravenous injection of UCNPs-Cu<sub>2-x</sub>S nanocomposites at timed intervals.
